# Supplementary material
Source: PubMed Central journal article supplement (PMC8525224)

| Biological models  | HLA-DPB1 matching |      |      | Total |
|--------------------|-------------------|------|------|-------|
|                    | matched           | 1 mm | 2 mm |       |
| <b>TCE3.1</b>      |                   |      |      |       |
| matched            | 257               | 0    | 0    | 257   |
| non-permissive     | 0                 | 157  | 154  | 311   |
| permissive         | 0                 | 269  | 72   | 341   |
| <b>TCE3.2</b>      |                   |      |      |       |
| matched            | 257               | 0    | 0    | 257   |
| non-permissive GvH | 0                 | 93   | 84   | 177   |
| non-permissive HvG | 0                 | 64   | 70   | 134   |
| permissive         | 0                 | 269  | 72   | 341   |
| <b>TCE4.1</b>      |                   |      |      |       |
| matched            | 257               | 0    | 0    | 257   |
| non-permissive     | 0                 | 239  | 195  | 434   |
| permissive         | 0                 | 187  | 31   | 218   |
| <b>TCE4.2</b>      |                   |      |      |       |
| matched            | 257               | 0    | 0    | 257   |
| non-permissive GvH | 0                 | 139  | 106  | 245   |
| non-permissive HvG | 0                 | 100  | 89   | 189   |
| permissive         | 0                 | 187  | 31   | 218   |
| <b>Expression</b>  |                   |      |      |       |
| matched            | 257               | 0    | 0    | 257   |
| R-high,D-high      | 0                 | 48   | 0    | 48    |
| R-high,D-low       | 0                 | 129  | 0    | 129   |
| R-low,D-high       | 0                 | 61   | 0    | 61    |
| R-low,D-low        | 0                 | 109  | 0    | 109   |
| not classified     | 0                 | 78§  | 227  | 305   |
| <b>PIRCHE I</b>    |                   |      |      |       |
| 0                  | 254               | 170  | 36   | 460   |
| 1-3                | 3*                | 185  | 124  | 312   |
| >3                 | 0                 | 71   | 66   | 137   |
| <b>PIRCHE II</b>   |                   |      |      |       |
| 0                  | 254               | 134  | 22   | 410   |
| 1-10               | 1*                | 158  | 100  | 259   |
| >10                | 2*                | 134  | 104  | 240   |

mm: mismatch; GvH: mm in graft versus host direction; HvG: mm in host versus graft direction; R: recipient; D: donor.

§: including 2 donor/recipient pairs with expression level not available and 76 pairs with a mismatch in the HvG direction only.

\*: 12/12 matched with the presence of an HLA-DRB3/4 mismatch.

**Supplementary table 1. Distribution of HLA mismatches according to the different biological models**

| HLA-DPB1 matching    | Categories         | OS (N=909; events=378)* |      |        |      | TRM (N=909, events=154)* |        |        |      | aGVHD $\geq$ 3 (N=832, events=86)* |             |        |      | cGVHD (N=813, events=288)* |      |             |         |      |      |      |             |
|----------------------|--------------------|-------------------------|------|--------|------|--------------------------|--------|--------|------|------------------------------------|-------------|--------|------|----------------------------|------|-------------|---------|------|------|------|-------------|
|                      |                    | events/n                | HR   | 95% CI | p    | events/n                 | HR     | 95% CI | p    | events/n                           | HR          | 95% CI | p    | events/n                   | HR   | 95% CI      | p       |      |      |      |             |
| Classical matching.1 | matched            | 103/257                 | 1.00 | -      |      | 31/257                   | 1.00   | -      |      | 19/244                             | 1.00        | -      |      | 74/230                     | 1.00 | -           |         |      |      |      |             |
|                      | 1 mm               | 174/426                 | 0.85 | 0.66   | 1.09 | 0.19                     | 69/426 | 1.01   | 0.66 | 1.56                               | 0.96        | 40/385 | 1.25 | 0.72                       | 2.17 | 0.43        | 149/376 | 1.09 | 0.83 | 1.45 | 0.53        |
|                      | 2 mm               | 101/226                 | 1.02 | 0.77   | 1.35 | 0.90                     | 54/226 | 1.58   | 1.01 | 2.47                               | <b>0.05</b> | 27/203 | 1.50 | 0.83                       | 2.71 | 0.18        | 65/207  | 0.95 | 0.68 | 1.33 | 0.76        |
| Classical matching.2 | matched            | 103/257                 | 1.00 | -      |      | 31/257                   | 1.00   | -      |      | 19/244                             | 1.00        | -      |      | 74/230                     | 1.00 | -           |         |      |      |      |             |
|                      | 1 mm bidirectional | 115/266                 | 0.89 | 0.68   | 1.17 | 0.41                     | 41/266 | 0.98   | 0.61 | 1.58                               | 0.94        | 25/247 | 1.22 | 0.66                       | 2.24 | 0.52        | 99/237  | 1.17 | 0.86 | 1.58 | 0.32        |
|                      | 1 mm GvH           | 27/84                   | 0.63 | 0.41   | 0.96 | <b>0.03</b>              | 12/84  | 0.82   | 0.42 | 1.61                               | 0.57        | 8/78   | 1.18 | 0.52                       | 2.70 | 0.69        | 32/74   | 1.08 | 0.71 | 1.65 | 0.71        |
|                      | 1 mm HvG           | 32/76                   | 0.97 | 0.64   | 1.45 | 0.87                     | 16/76  | 1.39   | 0.75 | 2.59                               | 0.30        | 7/60   | 1.45 | 0.61                       | 3.44 | 0.41        | 18/65   | 0.83 | 0.49 | 1.39 | 0.48        |
|                      | 2 mm               | 101/226                 | 1.02 | 0.77   | 1.35 | 0.89                     | 54/226 | 1.58   | 1.01 | 2.48                               | <b>0.05</b> | 27/203 | 1.50 | 0.83                       | 2.71 | 0.18        | 65/207  | 0.95 | 0.68 | 1.33 | 0.77        |
| TCE3.1               | matched            | 103/257                 | 1.00 | -      |      | 31/257                   | 1.00   | -      |      | 19/244                             | 1.00        | -      |      | 74/230                     | 1.00 | -           |         |      |      |      |             |
|                      | non-permissive     | 125/311                 | 0.86 | 0.66   | 1.13 | 0.28                     | 58/311 | 1.21   | 0.78 | 1.89                               | 0.39        | 32/278 | 1.31 | 0.74                       | 2.32 | 0.36        | 99/278  | 1.06 | 0.79 | 1.44 | 0.69        |
|                      | permissive         | 150/341                 | 0.94 | 0.73   | 1.21 | 0.63                     | 65/341 | 1.20   | 0.78 | 1.85                               | 0.42        | 35/310 | 1.37 | 0.78                       | 2.40 | 0.27        | 115/305 | 1.03 | 0.77 | 1.39 | 0.83        |
| TCE3.2               | matched            | 103/257                 | 1.00 | -      |      | 31/257                   | 1.00   | -      |      | 19/244                             | 1.00        | -      |      | 74/230                     | 1.00 | -           |         |      |      |      |             |
|                      | non-permissive GvH | 65/177                  | 0.78 | 0.57   | 1.07 | 0.12                     | 32/177 | 1.20   | 0.73 | 1.99                               | 0.48        | 18/160 | 1.31 | 0.69                       | 2.50 | 0.42        | 55/156  | 1.00 | 0.70 | 1.42 | 1.00        |
|                      | non-permissive HvG | 60/134                  | 0.97 | 0.70   | 1.35 | 0.87                     | 26/134 | 1.23   | 0.72 | 2.10                               | 0.45        | 14/118 | 1.31 | 0.65                       | 2.64 | 0.46        | 44/122  | 1.16 | 0.79 | 1.68 | 0.45        |
|                      | permissive         | 150/341                 | 0.94 | 0.73   | 1.22 | 0.64                     | 65/341 | 1.20   | 0.78 | 1.85                               | 0.42        | 35/310 | 1.37 | 0.78                       | 2.40 | 0.27        | 115/305 | 1.03 | 0.77 | 1.39 | 0.83        |
| TCE4.1               | matched            | 103/257                 | 1.00 | -      |      | 31/257                   | 1.00   | -      |      | 19/244                             | 1.00        | -      |      | 74/230                     | 1.00 | -           |         |      |      |      |             |
|                      | non-permissive     | 183/434                 | 0.87 | 0.68   | 1.11 | 0.27                     | 86/434 | 1.21   | 0.79 | 1.84                               | 0.38        | 45/390 | 1.32 | 0.77                       | 2.27 | 0.32        | 146/387 | 1.09 | 0.82 | 1.44 | 0.57        |
|                      | permissive         | 92/218                  | 0.97 | 0.73   | 1.29 | 0.84                     | 37/218 | 1.20   | 0.74 | 1.94                               | 0.46        | 22/198 | 1.38 | 0.75                       | 2.56 | 0.31        | 68/196  | 0.97 | 0.70 | 1.36 | 0.87        |
| TCE4.2               | matched            | 103/257                 | 1.00 | -      |      | 31/257                   | 1.00   | -      |      | 19/244                             | 1.00        | -      |      | 74/230                     | 1.00 | -           |         |      |      |      |             |
|                      | non-permissive GvH | 92/245                  | 0.75 | 0.56   | 1.00 | <b>0.05</b>              | 43/245 | 1.03   | 0.64 | 1.65                               | 0.91        | 22/223 | 1.11 | 0.60                       | 2.06 | 0.74        | 87/219  | 1.06 | 0.77 | 1.45 | 0.73        |
|                      | non-permissive HvG | 91/189                  | 1.05 | 0.79   | 1.40 | 0.74                     | 43/189 | 1.47   | 0.92 | 2.37                               | 0.11        | 23/167 | 1.63 | 0.88                       | 3.03 | 0.12        | 59/168  | 1.13 | 0.80 | 1.59 | 0.50        |
|                      | permissive         | 92/218                  | 0.98 | 0.74   | 1.30 | 0.87                     | 37/218 | 1.20   | 0.74 | 1.94                               | 0.46        | 22/198 | 1.39 | 0.75                       | 2.57 | 0.30        | 68/196  | 0.97 | 0.70 | 1.36 | 0.87        |
| Expression           | matched            | 103/257                 | 1.00 | -      |      | 31/257                   | 1.00   | -      |      | 19/244                             | 1.00        | -      |      | 74/230                     | 1.00 | -           |         |      |      |      |             |
|                      | R-high,D-high      | 20/48                   | 1.05 | 0.64   | 1.72 | 0.84                     | 11/48  | 1.77   | 0.85 | 3.69                               | 0.13        | 8/45   | 2.99 | 1.30                       | 6.88 | <b>0.01</b> | 18/39   | 1.69 | 0.99 | 2.87 | 0.05        |
|                      | R-high,D-low       | 43/129                  | 0.75 | 0.52   | 1.08 | 0.12                     | 19/129 | 1.11   | 0.62 | 1.99                               | 0.73        | 12/118 | 1.32 | 0.64                       | 2.74 | 0.46        | 36/114  | 0.88 | 0.59 | 1.31 | 0.52        |
|                      | R-low,D-high       | 30/61                   | 0.80 | 0.53   | 1.20 | 0.28                     | 6/61   | 0.44   | 0.18 | 1.08                               | 0.07        | 2/57   | 0.46 | 0.11                       | 2.01 | 0.30        | 27/57   | 1.18 | 0.76 | 1.85 | 0.46        |
|                      | R-low,D-low        | 46/109                  | 0.77 | 0.54   | 1.10 | 0.15                     | 17/109 | 0.84   | 0.46 | 1.55                               | 0.58        | 11/103 | 1.22 | 0.58                       | 2.57 | 0.61        | 50/99   | 1.29 | 0.90 | 1.86 | 0.17        |
| PIRCHE I             | 0                  | 192/460                 | 1.00 | -      |      | 72/460                   | 1.00   | -      |      | 38/422                             | 1.00        | -      |      | 143/405                    | 1.00 | -           |         |      |      |      |             |
|                      | 1-3                | 127/312                 | 0.86 | 0.69   | 1.08 | 0.19                     | 55/312 | 0.92   | 0.65 | 1.32                               | 0.66        | 34/291 | 1.17 | 0.73                       | 1.88 | 0.52        | 113/284 | 1.11 | 0.86 | 1.42 | 0.43        |
|                      | >3                 | 59/137                  | 1.06 | 0.79   | 1.42 | 0.72                     | 27/137 | 1.34   | 0.85 | 2.09                               | 0.21        | 14/119 | 1.29 | 0.69                       | 2.42 | 0.42        | 32/124  | 0.64 | 0.43 | 0.94 | <b>0.02</b> |
| PIRCHE II            | 0                  | 171/410                 | 1.00 | -      |      | 57/410                   | 1.00   | -      |      | 32/377                             | 1.00        | -      |      | 120/363                    | 1.00 | -           |         |      |      |      |             |
|                      | 1-10               | 105/259                 | 0.86 | 0.67   | 1.10 | 0.23                     | 45/259 | 1.04   | 0.70 | 1.55                               | 0.84        | 29/244 | 1.38 | 0.83                       | 2.29 | 0.22        | 98/238  | 1.31 | 1.00 | 1.72 | <b>0.05</b> |
|                      | >10                | 102/240                 | 0.96 | 0.75   | 1.23 | 0.73                     | 52/240 | 1.46   | 1.00 | 2.14                               | 0.05        | 25/211 | 1.21 | 0.70                       | 2.08 | 0.50        | 70/212  | 0.87 | 0.65 | 1.18 | 0.37        |

\*: the number of patients/events for the regressions with expression is N=604/242, 604/84, 579/191, 564/52, 539/205 and 558/212 for OS, TRM, aGVHD $\geq$ 2, aGVHD $\geq$ 3, cGVHD and relprog, respectively. \*\*: patients with non-malignant disorder are excluded from analyses on relapse.

events: number of events in the risk category for the specified outcome, n: number of patients in the risk category for the specified outcome.

0.05 > p  $\geq$  0.01 are shown in bold and italic, p<0.01 are shown in bold, italic and underlined. GvH: mm in graft versus host direction; HvG: mm in host versus graft direction; R: recipient; D: donor.

Significant co-variables retained for OS: type of diagnosis, status of disease, co-morbid conditions and graft manipulation.

Significant co-variables retained for TRM: type of diagnosis, status of disease, co-morbid conditions, graft manipulation and transplant center.

Significant co-variables retained for aGVHD: HLA-DRB3/4/5 matching, graft manipulation and transplant center.

Significant co-variables retained for cGVHD: age of patient, status of disease, graft manipulation and transplant center.

Significant co-variables retained for relprog: EBMT risk score, graft manipulation and transplant center.

#### Supplementary table 2. Multivariable analyses for several HSCT outcomes and association with each HLA-DPB1 matching model

| HLA-DPB1 matching      | Categories                   | OS (N=909; events=378)* |      |        |      |             | TRM (N=909, events=154)* |      |        |      |      | aGVHD $\geq$ 3 (N=832, events=86)* |      |        |      |      | cGVHD (N=813, events=288)* |      |        |      |      |
|------------------------|------------------------------|-------------------------|------|--------|------|-------------|--------------------------|------|--------|------|------|------------------------------------|------|--------|------|------|----------------------------|------|--------|------|------|
|                        |                              | events/n                | HR   | 95% CI |      | p           | events/n                 | HR   | 95% CI |      | p    | events/n                           | HR   | 95% CI |      | p    | events/n                   | HR   | 95% CI |      | p    |
| TCE3.1 & PIRCHE II     | matched                      | 103/257                 | 1.00 | -      |      |             | 31/257                   | 1.00 | -      |      |      | 19/244                             | 1.00 | -      |      |      | 74/230                     | 1.00 | -      |      |      |
|                        | non-permissive, no PIRCHE II | 24/55                   | 0.87 | 0.55   | 1.36 | 0.53        | 20/302                   | 0.85 | 0.39   | 1.88 | 0.70 | 5/50                               | 1.05 | 0.39   | 2.83 | 0.92 | 22/48                      | 1.21 | 0.75   | 1.96 | 0.43 |
|                        | non-permissive, PIRCHE II    | 101/256                 | 0.86 | 0.65   | 1.14 | 0.30        | 50/256                   | 1.30 | 0.82   | 2.05 | 0.26 | 27/228                             | 1.38 | 0.76   | 2.50 | 0.30 | 77/230                     | 1.03 | 0.75   | 1.42 | 0.87 |
|                        | permissive, no PIRCHE II     | 45/101                  | 1.01 | 0.71   | 1.45 | 0.94        | 18/101                   | 1.14 | 0.63   | 2.06 | 0.67 | 8/86                               | 1.21 | 0.53   | 2.76 | 0.66 | 24/88                      | 0.80 | 0.51   | 1.28 | 0.35 |
|                        | permissive, PIRCHE II        | 105/240                 | 0.92 | 0.70   | 1.21 | 0.53        | 47/240                   | 1.22 | 0.77   | 1.93 | 0.40 | 27/224                             | 1.43 | 0.79   | 2.59 | 0.23 | 91/217                     | 1.12 | 0.82   | 1.53 | 0.48 |
| TCE4.1 & PIRCHE II     | matched                      | 103/257                 | 1.00 | -      |      |             | 31/257                   | 1.00 | -      |      |      | 19/244                             | 1.00 | -      |      |      | 74/230                     | 1.00 | -      |      |      |
|                        | non-permissive, no PIRCHE II | 44/99                   | 0.88 | 0.61   | 1.26 | 0.47        | 17/99                    | 0.99 | 0.54   | 1.80 | 0.96 | 9/87                               | 1.19 | 0.54   | 2.63 | 0.67 | 36/86                      | 1.12 | 0.75   | 1.67 | 0.59 |
|                        | non-permissive, PIRCHE II    | 139/335                 | 0.87 | 0.67   | 1.13 | 0.30        | 69/335                   | 1.28 | 0.83   | 1.97 | 0.27 | 36/303                             | 1.37 | 0.78   | 2.40 | 0.28 | 110/301                    | 1.08 | 0.80   | 1.45 | 0.63 |
|                        | permissive, no PIRCHE II     | 25/57                   | 1.13 | 0.73   | 1.77 | 0.58        | 21/064                   | 1.14 | 0.53   | 2.41 | 0.74 | 4/49                               | 1.05 | 0.36   | 3.09 | 0.93 | 10/50                      | 0.63 | 0.33   | 1.23 | 0.18 |
|                        | permissive, PIRCHE II        | 67/161                  | 0.93 | 0.68   | 1.26 | 0.62        | 28/161                   | 1.22 | 0.73   | 2.03 | 0.46 | 18/149                             | 1.49 | 0.78   | 2.85 | 0.23 | 58/146                     | 1.07 | 0.76   | 1.52 | 0.69 |
| Expression & PIRCHE II | matched                      | 103/257                 | 1.00 | -      |      |             | 31/257                   | 1.00 | -      |      |      | 19/244                             | 1.00 | -      |      |      | 74/230                     | 1.00 | -      |      |      |
|                        | R-high, no PIRCHE II §       | 8/13                    | NI   | NI     | NI   | NI          | 4/13                     | NI   | NI     | NI   | NI   | 2/12                               | NI   | NI     | NI   | NI   | 1/11                       | NI   | NI     | NI   | NI   |
|                        | R-high, PIRCHE II            | 55/164                  | 0.75 | 0.53   | 1.04 | 0.08        | 26/164                   | 1.16 | 0.68   | 1.98 | 0.58 | 18/151                             | 1.65 | 0.86   | 3.17 | 0.13 | 53/142                     | 1.05 | 0.73   | 1.50 | 0.80 |
|                        | R-low, no PIRCHE II          | 19/45                   | 0.73 | 0.44   | 1.19 | 0.21        | 5/45                     | 0.51 | 0.19   | 1.35 | 0.18 | 2/42                               | 0.60 | 0.14   | 2.59 | 0.50 | 20/39                      | 1.25 | 0.76   | 2.07 | 0.38 |
|                        | R-low, PIRCHE II             | 57/125                  | 0.80 | 0.58   | 1.11 | 0.19        | 18/125                   | 0.75 | 0.41   | 1.37 | 0.35 | 11/118                             | 1.12 | 0.53   | 2.38 | 0.77 | 57/117                     | 1.25 | 0.89   | 1.78 | 0.20 |
| Expression & TCE3.1    | matched                      | 103/257                 | 1.00 | -      |      |             | 31/257                   | 1.00 | -      |      |      | 19/244                             | 1.00 | -      |      |      | 74/230                     | 1.00 | -      |      |      |
|                        | R-high, non-permissive       | 34/96                   | 0.79 | 0.53   | 1.17 | 0.24        | 15/96                    | 1.16 | 0.61   | 2.21 | 0.64 | 10/86                              | 1.52 | 0.70   | 3.28 | 0.29 | 32/82                      | 1.19 | 0.78   | 1.81 | 0.43 |
|                        | R-high, permissive           | 29/81                   | 0.86 | 0.57   | 1.31 | 0.49        | 15/81                    | 1.39 | 0.74   | 2.60 | 0.30 | 10/77                              | 1.92 | 0.89   | 4.16 | 0.10 | 22/71                      | 0.89 | 0.55   | 1.44 | 0.63 |
|                        | R-low, non-permissive        | 14/38                   | 0.58 | 0.33   | 1.02 | 0.06        | 2/38                     | 0.29 | 0.07   | 1.22 | 0.09 | 0/36                               | 0.00 | 0.00   | .    | 0.97 | 15/36                      | 1.23 | 0.70   | 2.15 | 0.48 |
|                        | R-low, permissive            | 62/132                  | 0.85 | 0.62   | 1.17 | 0.32        | 21/132                   | 0.79 | 0.44   | 1.41 | 0.43 | 13/124                             | 1.25 | 0.62   | 2.55 | 0.53 | 62/120                     | 1.26 | 0.89   | 1.77 | 0.19 |
| Expression & TCE4.1    | matched                      | 103/257                 | 1.00 | -      |      |             | 31/257                   | 1.00 | -      |      |      | 19/244                             | 1.00 | -      |      |      | 74/230                     | 1.00 | -      |      |      |
|                        | R-high, non-permissive       | 39/105                  | 0.80 | 0.55   | 1.17 | 0.25        | 17/105                   | 1.17 | 0.63   | 2.17 | 0.62 | 11/95                              | 1.50 | 0.71   | 3.17 | 0.29 | 35/90                      | 1.18 | 0.79   | 1.77 | 0.43 |
|                        | R-high, permissive           | 24/72                   | 0.86 | 0.55   | 1.35 | 0.52        | 13/72                    | 1.40 | 0.73   | 2.71 | 0.32 | 9/68                               | 2.06 | 0.93   | 4.58 | 0.08 | 19/63                      | 0.86 | 0.52   | 1.43 | 0.56 |
|                        | R-low, non-permissive        | 39/95                   | 0.68 | 0.47   | 0.99 | <b>0.04</b> | 12/95                    | 0.53 | 0.26   | 1.06 | 0.07 | 5/89                               | 0.71 | 0.26   | 1.93 | 0.51 | 41/87                      | 1.18 | 0.80   | 1.74 | 0.39 |
|                        | R-low, permissive            | 37/75                   | 0.92 | 0.63   | 1.35 | 0.68        | 11/75                    | 0.96 | 0.48   | 1.93 | 0.90 | 8/71                               | 1.29 | 0.56   | 2.95 | 0.56 | 36/69                      | 1.34 | 0.89   | 2.01 | 0.16 |

\*: the number of patients/events for the regressions with expression is N=604/242, 604/84, 579/191, 564/52, 539/205 and 558/212 for OS, TRM, aGVHD $\geq$ 2, aGVHD $\geq$ 3, cGVHD and relprog, respectively. \*\*: patients with non-malignant disorder are excluded from analyses on relapse.

events: number of events in the risk category for the specified outcome, n: number of patients in the risk category for the specified outcome.

0.05 > p  $\geq$  0.01 are shown in bold and italic, p<0.01 are shown in bold, italic and underlined. R: recipient; D: donor.

§: not interpretable (NI) because of the very small number of patients in this group.

Significant co-variables retained for OS: type of diagnosis, status of disease, co-morbid conditions and graft manipulation.

Significant co-variables retained for TRM: type of diagnosis, status of disease, co-morbid conditions, graft manipulation and transplant center.

Significant co-variables retained for aGVHD: HLA-DRB3/4/5 matching, graft manipulation and transplant center.

Significant co-variables retained for cGVHD: age of patient, status of disease, graft manipulation and transplant center.

Significant co-variables retained for relprog: EBMT risk score, graft manipulation and transplant center.

### Supplementary table 3. Multivariable analyses for several HSCT outcomes and association with combined biological models

### **Supplementary Figure 1**

**Distribution of the number of PIRCHE I and II according to classical matching, TCE and expression.** The number of donor/recipient pairs included in each group is indicated above the boxplots (more details in Table 2). Each dot indicates the number of potential binders predicted by the PIRCHE algorithm in a given donor/recipient pair. The color of the dot represents the matching status between donor and recipient at HLA-DPB1 (i.e. 0, 1 or 2 mismatches) and HLA-DRB3/4/5 (i.e. absence or presence of a mismatch). The models TCE3.1 and TCE4.2 were chosen among the four alternative TCE models investigated in this study to illustrate the distribution of potential binders in permissive and non-permissive (total, HvG or GvH) mismatched groups. Similar distributions were observed for TCE3.2 and TCE4.1 (data not shown). HvG: incompatibility in the host versus graft direction, GvH: incompatibility in the graft versus host direction, TCE: T-Cell Epitopes, PIRCHE: Predicted Indirectly ReCognizable HLA Epitopes, mm: mismatch.

### **Supplementary Figure 2**

Selected Kaplan Meier (KM) plots for single HLA-DPB1 models and acute GVHD  $\geq 2$ .

### **Supplementary Figure 3**

Selected Kaplan Meier (KM) plots for single HLA-DPB1 models and relapse/progression.

### **Supplementary Figure 4**

Kaplan Meier (KM) plots for the five combined HLA-DPB1 models and acute GVHD  $\geq 2$ .

### **Supplementary Figure 5**

Kaplan Meier (KM) plots for the five combined HLA-DPB1 models and relapse/progression.

## Classical matching.2

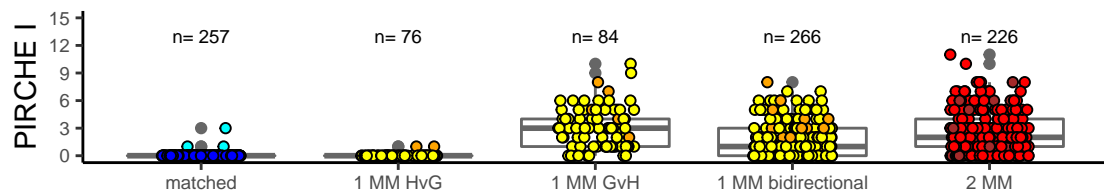

## Classical matching.2

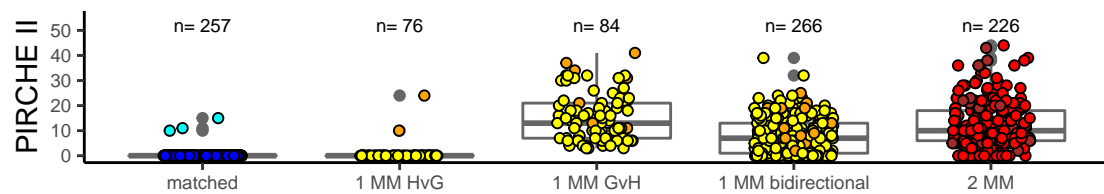

## TCE3.1

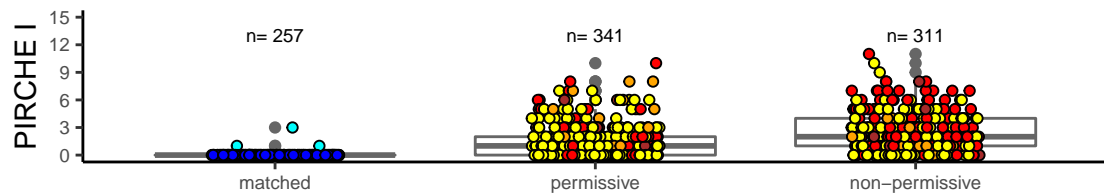

## TCE3.1

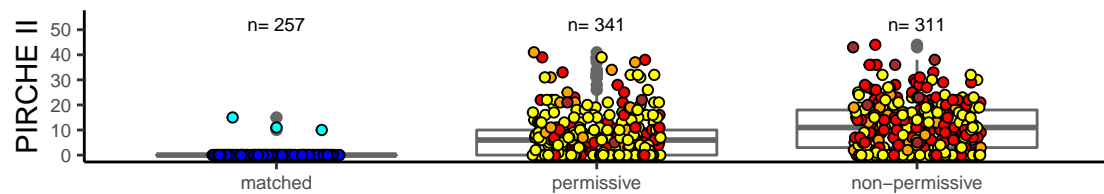

## TCE4.2

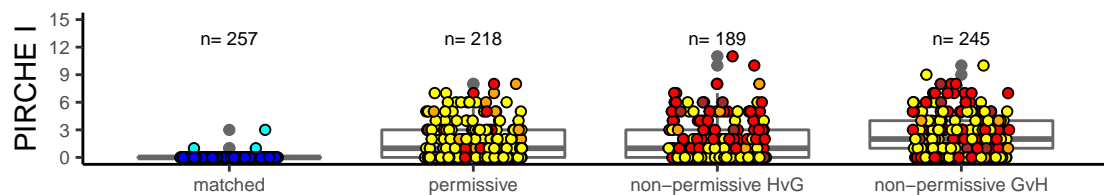

## TCE4.2

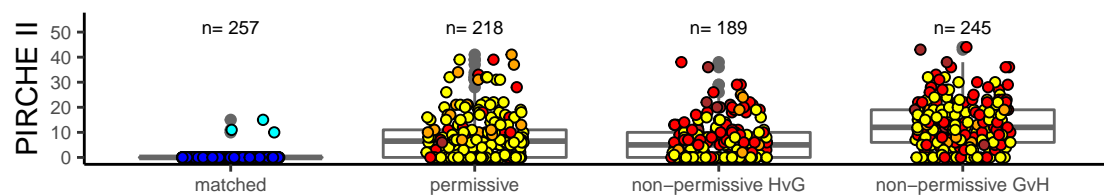

## Expression

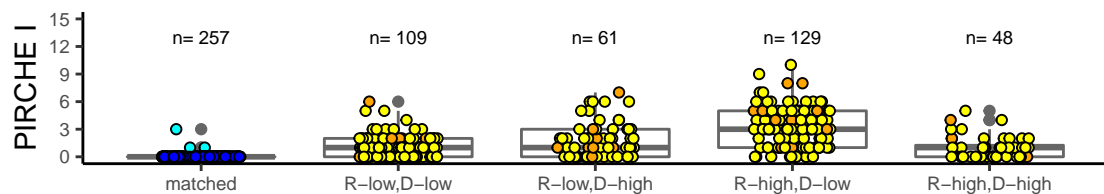

## Expression

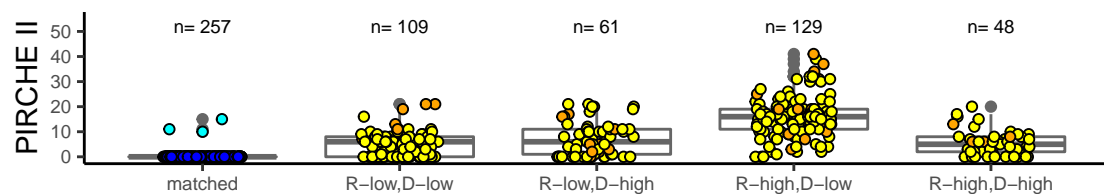

## Expression & TCE3.1

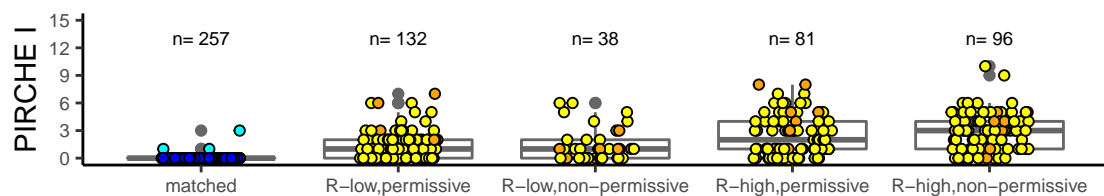

## Expression & TCE3.1

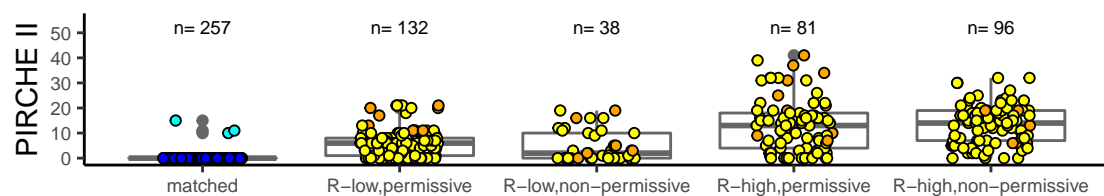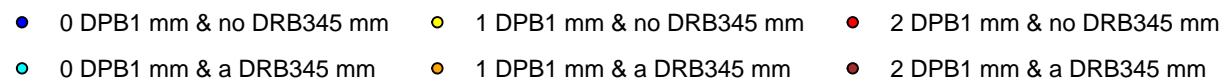

# Acute GVHD $\geq 2$

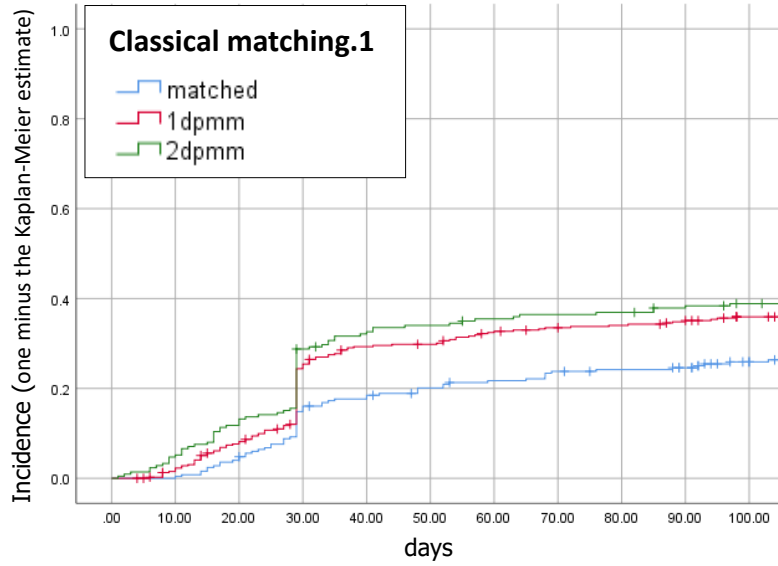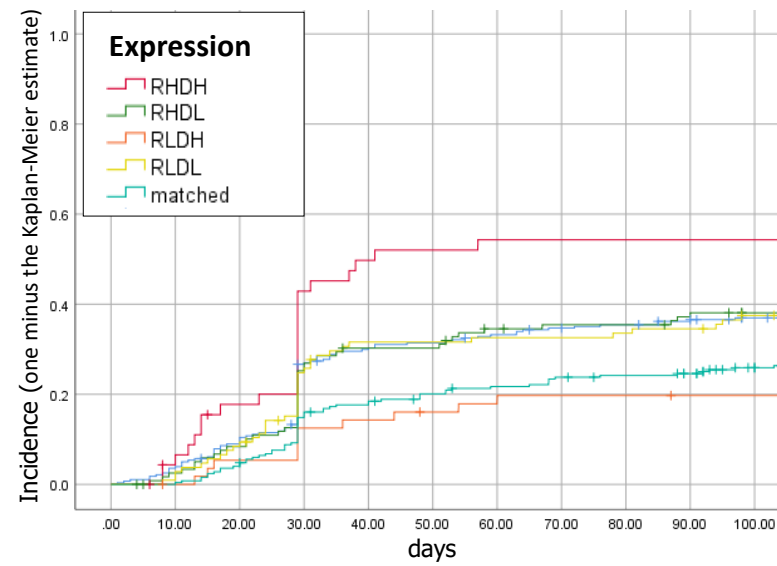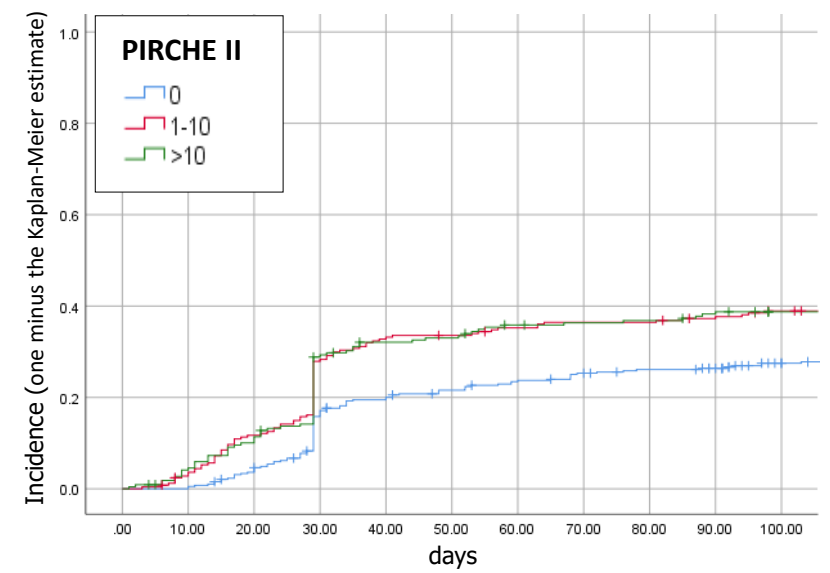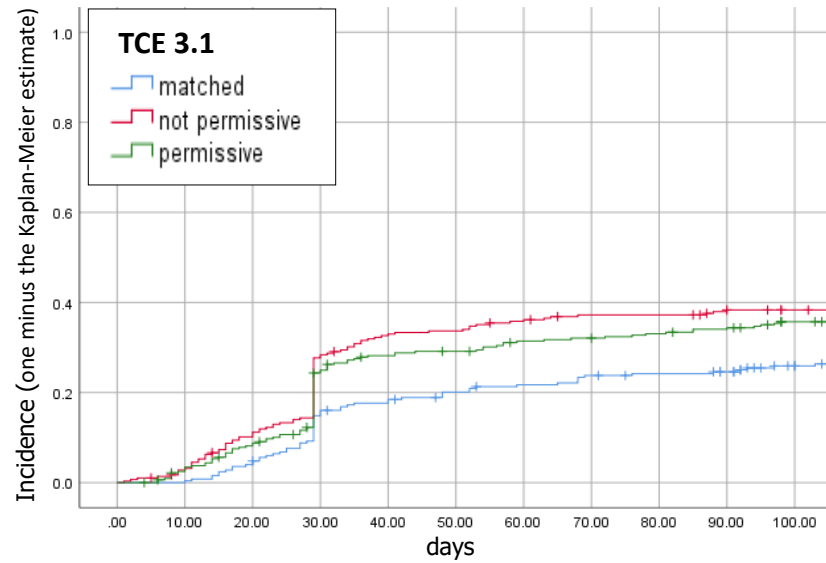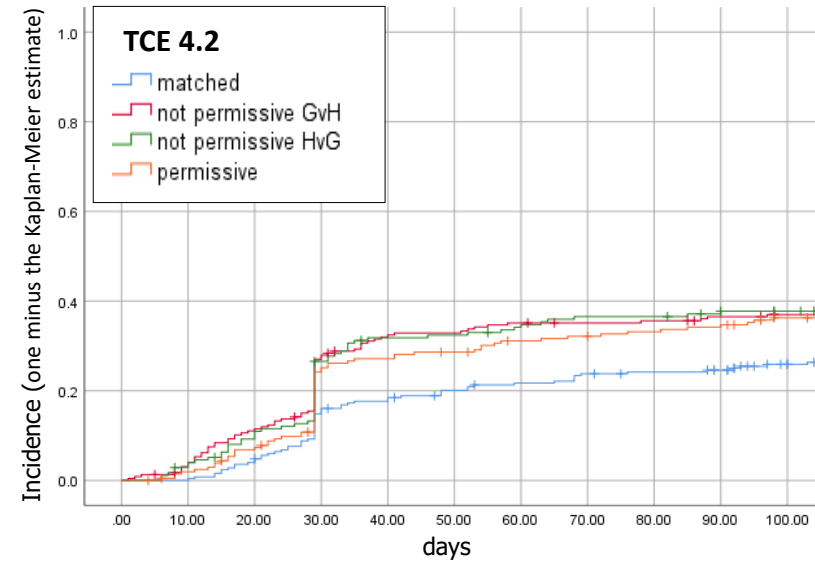

# Relapse/progression

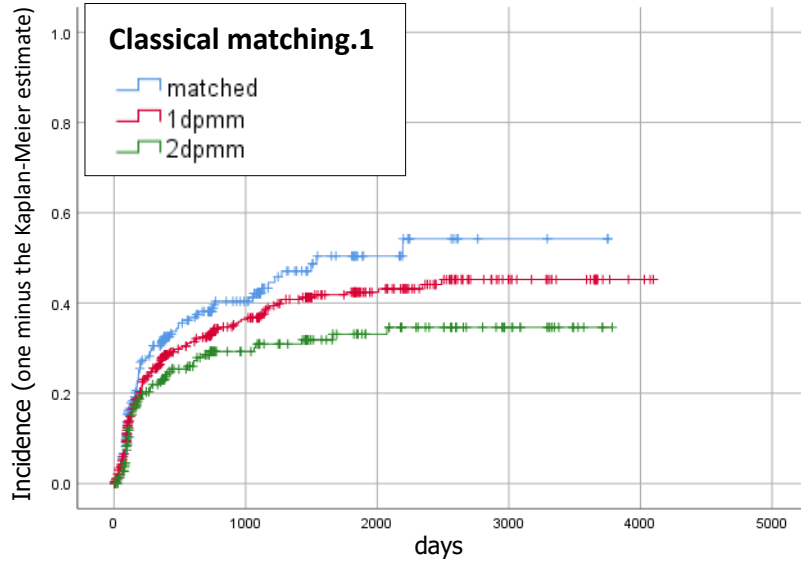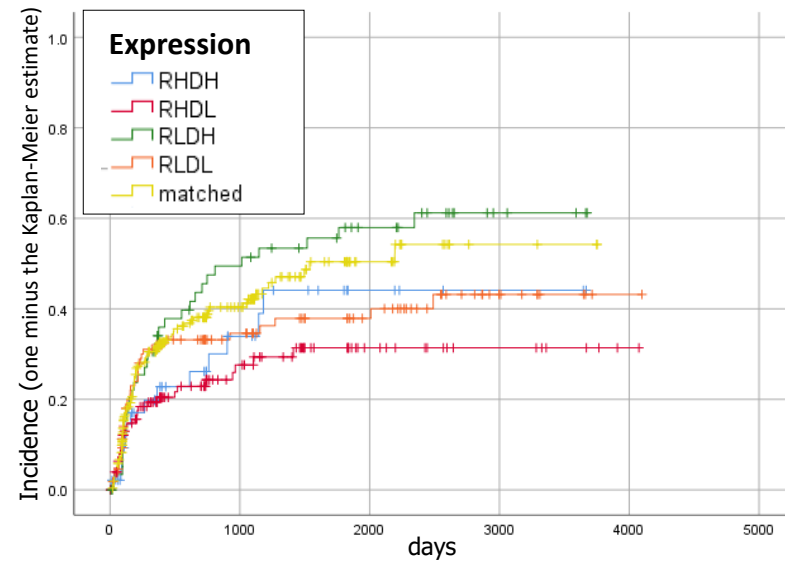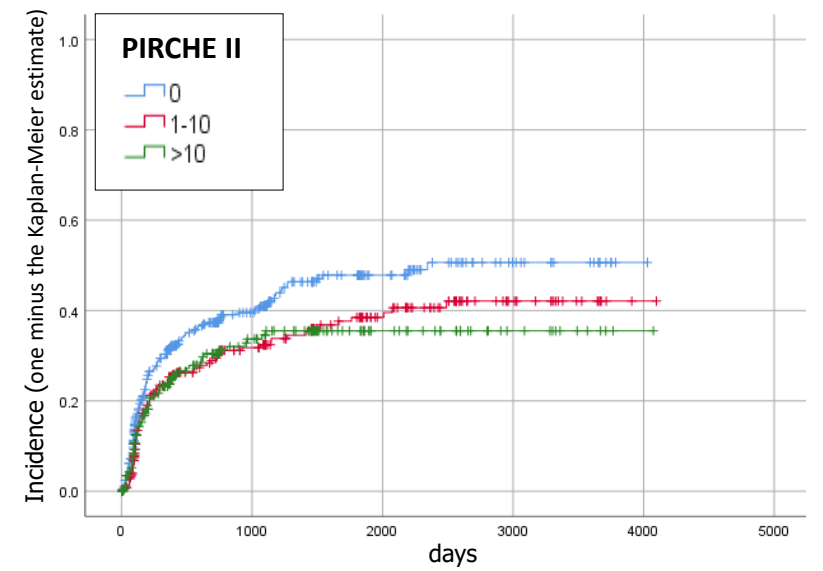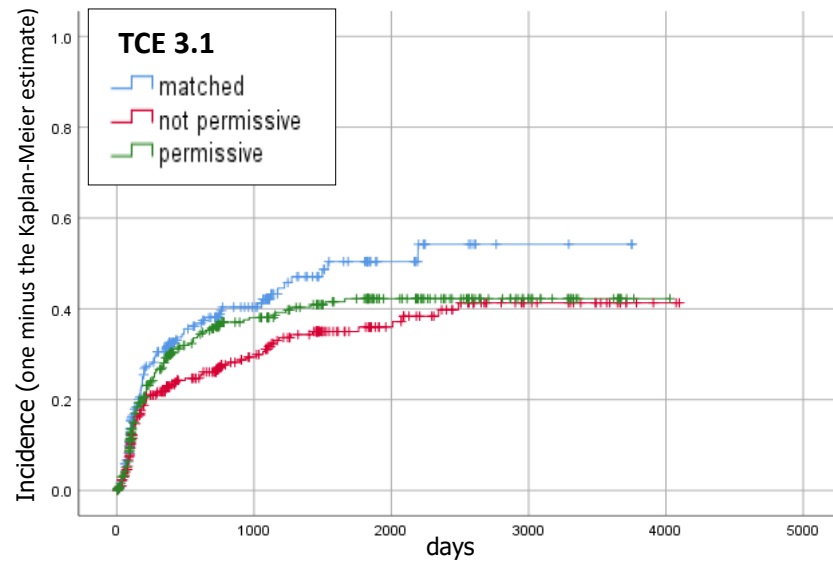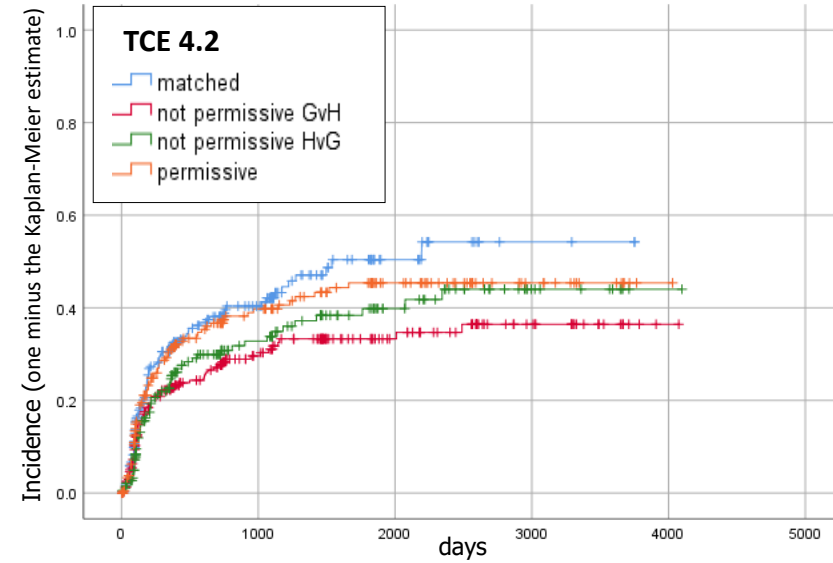

# Acute GVHD $\geq 2$

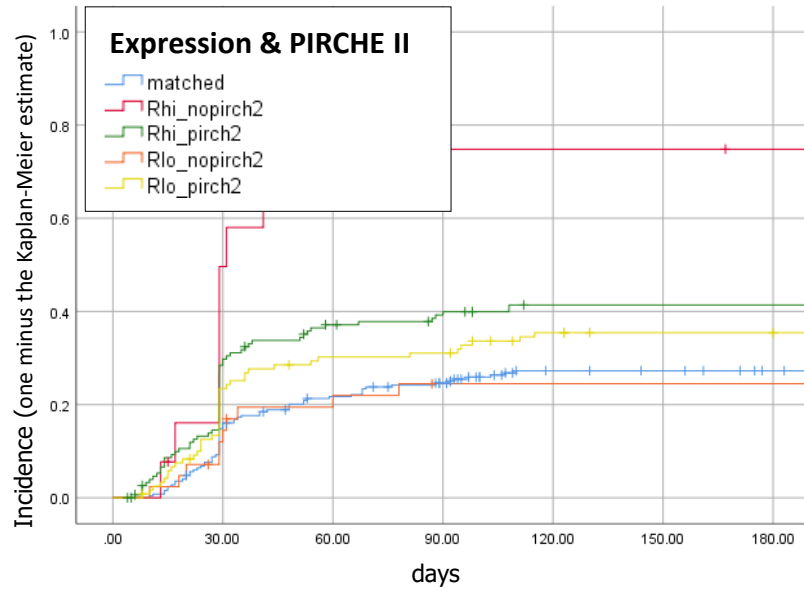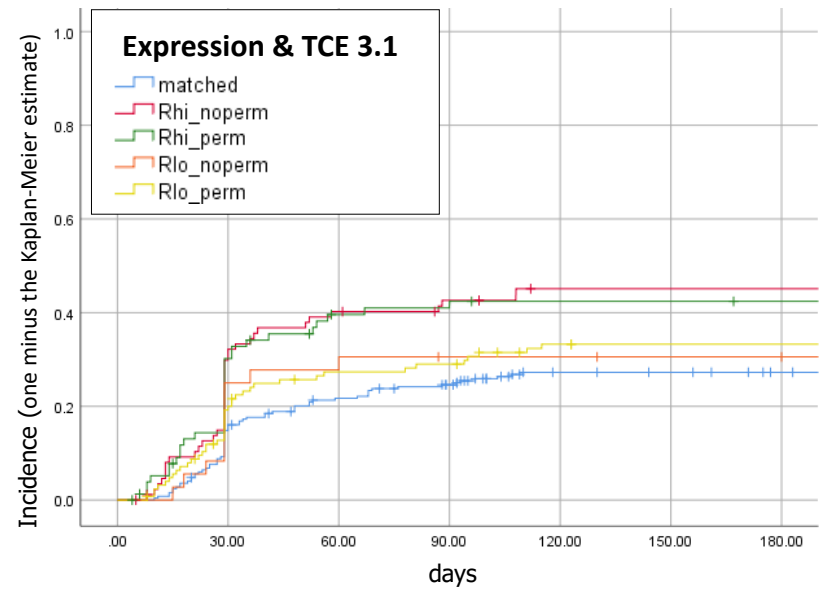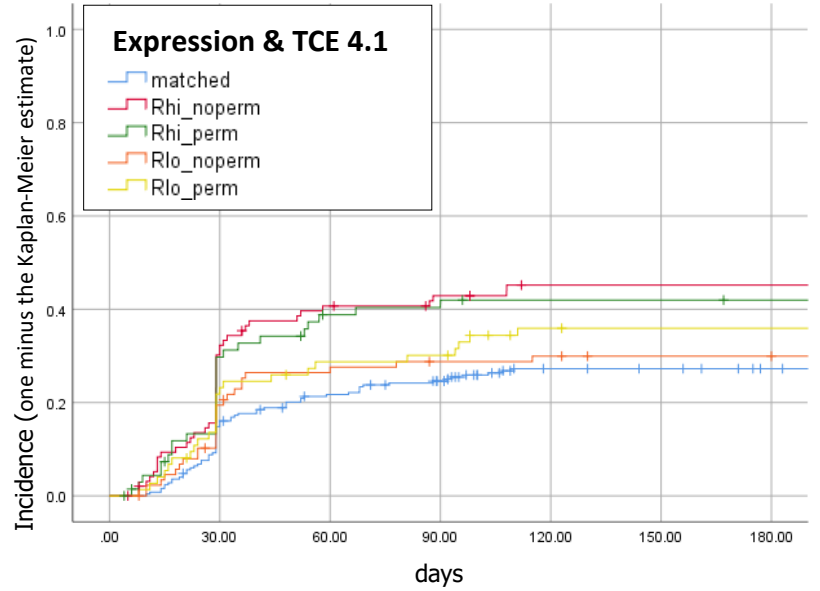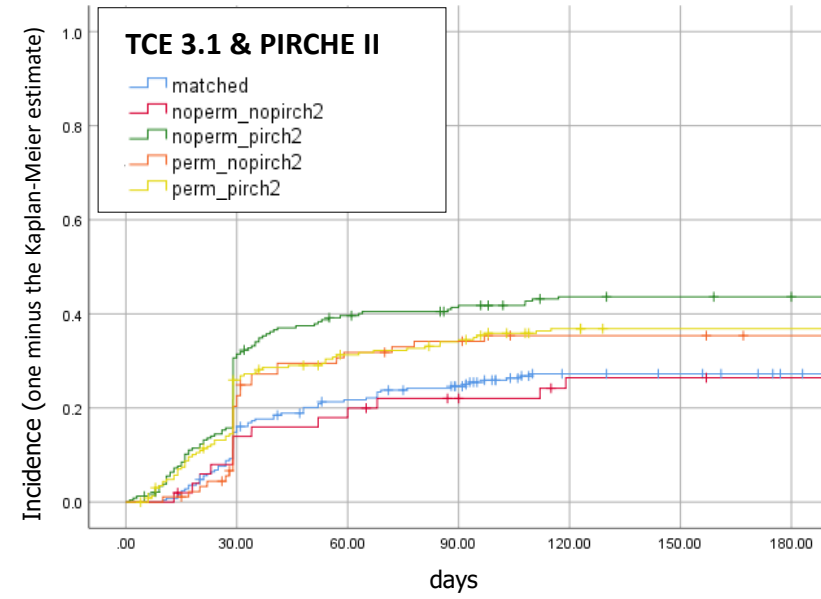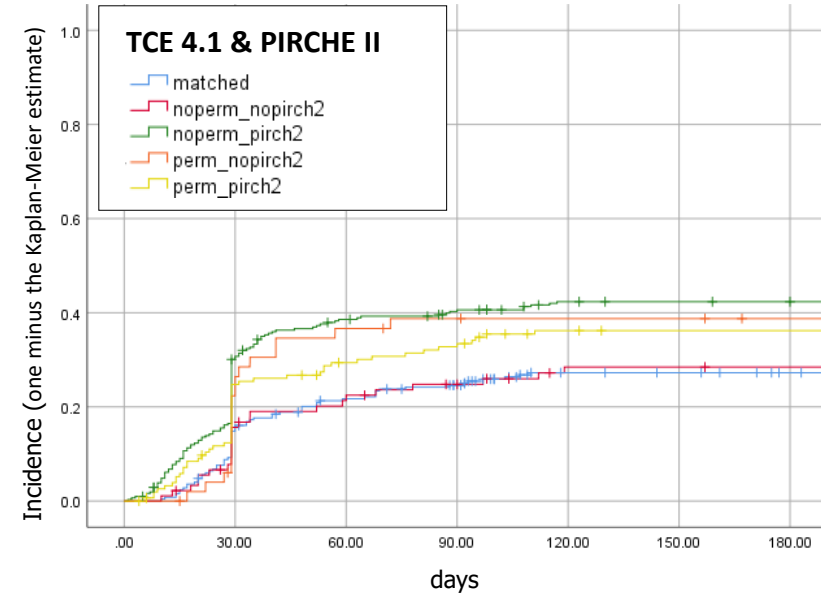



# Relapse/progression

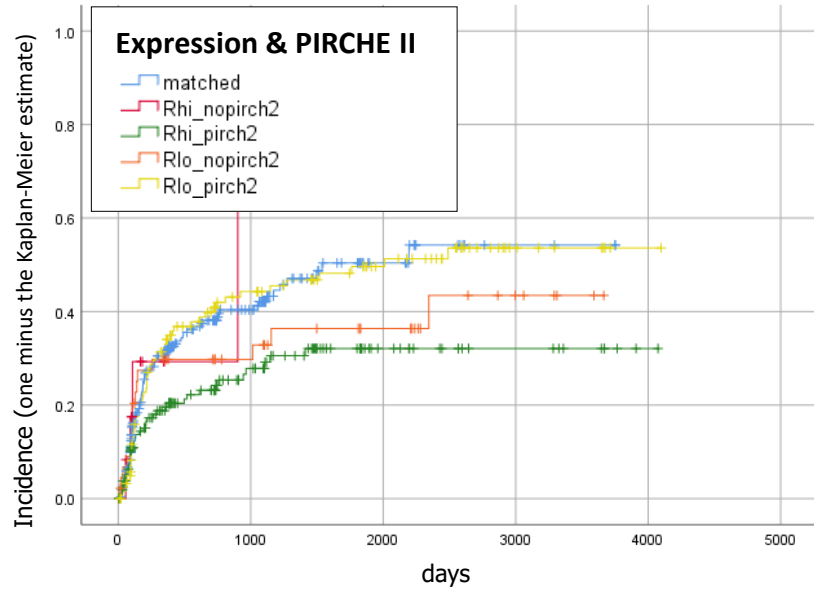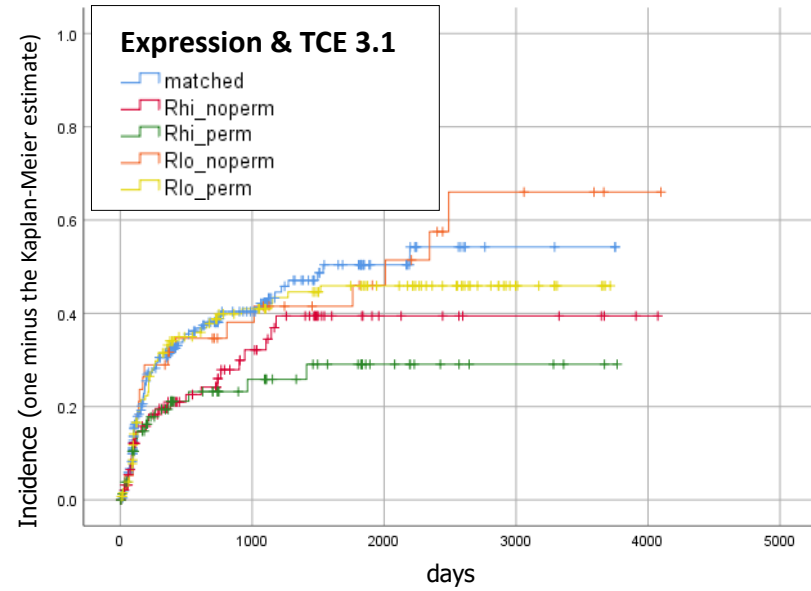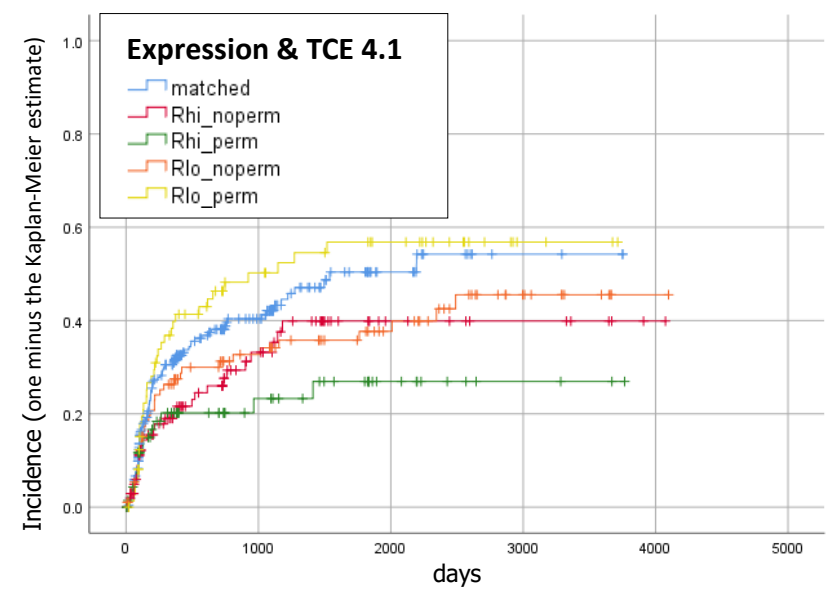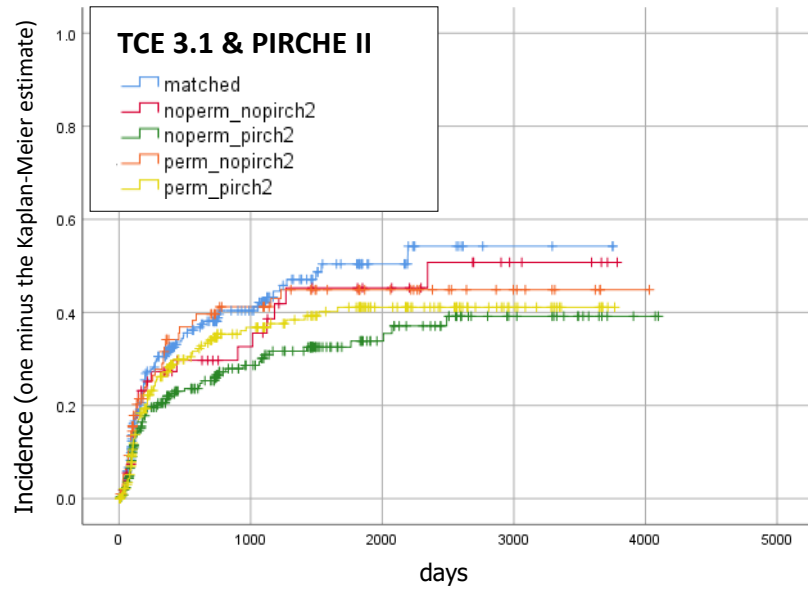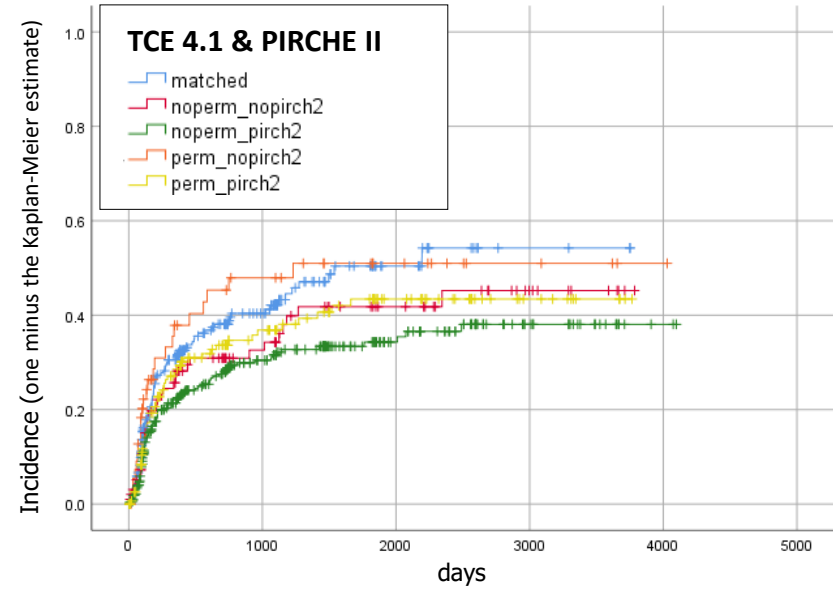

Supplement: advancesADV2020003998-suppl1.pdf [file advancesADV2020003998-suppl1.pdf]
